# Supplementary material for: Glutamine catabolism supports amino acid biosynthesis and suppresses the integrated stress response to promote photoreceptor survival
Source: eLife. 2025 May 21;13:RP100747. doi: 10.7554/eLife.100747 (PMC12094702; doi:10.7554/eLife.100747)
Supplement: Supplementary file 1. [file elife-100747-supp1.xlsx]

## Sheet: Sheet1
		Supplementary Table 1. Primers utilized in qRT-PCR experiments to measure gene expression.
		Gene	Forward Primer	Reverse Primer
		Gls	CGTTCCATGTTGGTCTTCCT	ATCACCGACTTCACCCTTTG
		Gls2	GACCGTGGTGAACCTGCTAT	ACCTCCAGGTGGTTGAACTG
		Actb	AGCCATGTACGTAGCCATCC	CTCTCAGCTGTGGTGGTGAA
		Aco2	CAACATGGGTGCAGAAATTG	GTGAGCCAAGTCAGGGGTAA
		Idh3a	GAGGTTTTGCTGGTGGTGTT	TCCTCCTGGTCCTTGAATTG
		Idh3b	ATCTGAGCGAGGTGCAGAAT	TACGTTGGCAAACAAATCCA
		Idh3g	TGTAAGCTCCAACGCTGATG	CACTCCTGGCAGGCTCTTAC
		Ogdh	ACATGGCACAGTGCATCATT	ACATCTGCAGAAACCGCTCT
		Suclg1	AGATTCCCTTGGTTGTGTGC	GGGTTGTTTGGTGAACTGCT
		Suclg2	CTTTGGTGGGATCGTCAACT	AACAGCTTTCTTGGCTGCAT
		Sdha	ACACAGACCTGGTGGAGACC	GGATGGGCTTGGAGTAATCA
		Sdhb	ACTGGTGGAACGGAGACAAG	TTAAGCCAATGCTCGCTTCT
		Sdhc	GGAGGGGTCTCTCTTTTTGG	AAGTGTCGGATCCCATTCAG
		Sdhd	GATCCCTGCTGGGTACTTGA	AAGTAGCAAAGCCCAGCAAA
		Fh1	AGCAATGCATATTGCTGCTG	CGCATACTGGACTTGCTGAA
		Mdh1	GAAGCCCTGAAAGACGACAG	TCGACACGAACTCTCCCTCT
		Mdh1b	CATAGCCACCACCCTGAAGT	TGAATCAGATCGCCTGTGAG
		Mdh2	GCTTTGTCTTCTCCCTCGTG	CAAAGTCCTCGCCTTTCTTG
		Cs	TGCCTAAGGATCCCATGTTC	TTCATCTCCGTCATGCCATA
		Acly	GAAGCTGACCTTGCTGAACC	CTGCCTCCAATGATGAGGAT
		Pdha1	GGGACGTCTGTTGAGAGAGC	TGTGTCCATGGTAGCGGTAA
		Pdhb	TCGAAGCCATAGAAGCCAGT	AGGCATAGGGACATCAGCAC
		Hk2	GGGACGACGGTACACTCAAT	GCCAGTGGTAAGGAGCTCTG
		Pdk1	GGCGGCTTTGTGATTTGTAT	ACCTGAATCGGGGGATAAAC
		Pdk2	AGGAAGTCAATGCCACCAAC	GAGGGCCACCATAATCTTGA
		Pdk3	GTGGAGTCCCACTTCGAAAA	AAAACTGGCAGCCTCTCAAA
		Pdk4	CCTTTGGCTGGTTTTGGTTA	CCTGCTTGGGATACACCAGT
		Pcx	ATGTTGTGGACGTGGCAGTA	AATCGAAGGCTGCGTACAGT
		Bcat1	TAGAATGTGCCGATCTGCTG	CTTTGGAAGGCTTCTTGACG
		Bcat2	GGACCCATGAAGACGGAGTA	CCCGCTTCAATTCCTTCATA
		Me1	GGGATTGCTCACTTGGTTGT	GTTCATGGGCAAACACCTCT
		Me2	TTGTGTTCCCTGCATGGTTA	ATACAGACGGGCAGACCAAC
		Sod1	CCAGTGCAGGACCTCATTTT	CACCTTTGCCCAAGTCATCT
		Sod2	CCGAGGAGAAGTACCACGAG	GCTTGATAGCCTCCAGCAAC
		Slc7a11	CCCAGATATGCATCGTCCTT	CGTCTGAACCACTTGGGTTT
		Gch1	CACCAAGGGATACCAGGAGA	AGCCAATATGGACCCTTCCT
		Chac1	GTACGGCTCCCTAGTGTGGA	GTCTTCAAGGAGGGTCACCA
		Ptgs2	AGAAGGAAATGGCTGCAGAA	GCTCGGCTTCCAGTATTGAG
		Atg5	AGATGGACAGCTGCACACAC	GCTGGGGGACAATGCTAATA
		Sqstm1	GCTCAGGAGGAGACGATGAC	AGAAACCCATGGACAGCATC
		Ripk1	CCTGCTGGAGAAGACAGACC	CATCATCTTCCCCTCTTCCA
		Ripk3	ACACGGCACTCCTTGGTATC	CCGAACTGTGCTTGGTCATA
		Casp3	GGGCCTGTTGAACTGAAAAA	CCGTCCTTTGAATTTCTCCA
		Casp8	CCTAGACTGCAACCGAGAGG	GCAGGCTCAAGTCATCTTCC
		Casp9	GATGCTGTCCCCTATCAGGA	GGGACTGCAGGTCTTCAGAG
