# Supplementary figures and images for: Glutamine catabolism supports amino acid biosynthesis and suppresses the integrated stress response to promote photoreceptor survival
Source: eLife journal article supplement (doi:10.7554/elife.100747), 2024-08-28

Office DEPOT®

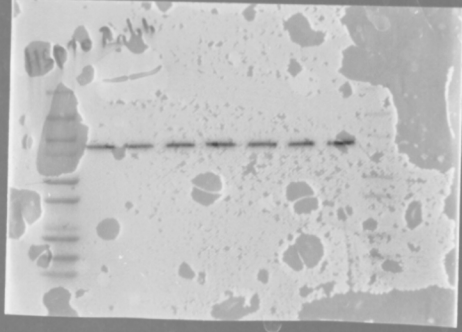

Supplement: fig1-data2 [file elife-100747-fig1-data2-v1.zip]

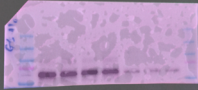

Supplement: fig3-data2 [file elife-100747-fig3-data2-v1.zip]

Office DEPOT®

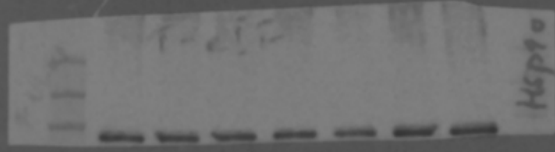

Supplement: fig4-data2 [file elife-100747-fig4-data2-v1.zip]
